# Supplementary material for: 3,3′-Diindolylmethane Promotes Gastric Cancer Progression via β-TrCP-Mediated NF-κB Activation in Gastric Cancer-Derived MSCs
Source: PubMed Central journal article supplement (PMC8024625; doi:10.3389/fonc.2021.603533), 2021-03-24
Supplement: DataSheet_1.pdf [file DataSheet_1.pdf]

# **3,3'-Diindolylmethane Promotes Gastric Cancer Progression via $\beta$ -TrCP-Mediated NF- $\kappa$ B activation in Gastric Cancer derived MSCs**

**Shi Hui<sup>1,2#</sup>, Sun Yaoxiang<sup>2,3#</sup>, Ruan Hongru<sup>4</sup>, Ji Cheng<sup>1</sup>, Zhang Jiahui<sup>1</sup>, Wu Peipei<sup>1</sup>, Li Linli<sup>1</sup>,  
Huang Chihan<sup>1</sup>, Jia Yuanwang<sup>1</sup>, Zhang Xu<sup>1</sup>, Xu Wenrong<sup>1,2</sup>, Jiang Jiajia<sup>1,2\*</sup>, Qian Hui<sup>1\*</sup>**

<sup>1</sup>Jiangsu Key Laboratory of Medical Science and Laboratory Medicine, Institute of Stem Cell, School of Medicine, Jiangsu University, Zhenjiang, Jiangsu 212013, China

<sup>2</sup> Institute of Cancer, Affiliated Aoyang hospital of Jiangsu University, Zhangjiagang, Suzhou, 215600, China

<sup>3</sup>Department of Clinical Laboratory, The Affiliated Yixing Hospital of Jiangsu University, Yixing, Jiangsu 214200, China

<sup>4</sup>Department of Burn Orthopedics, The Affiliated People's Hospital, Jiangsu University, Zhenjiang, China.

#These authors contributed equally to this work.

**\* Correspondence:**

Qian Hui

[lstmmmlst@163.com](mailto:lstmmmlst@163.com)

Jiang Jiajia

[Jiangjiajia\\_2001@163.com](mailto:Jiangjiajia_2001@163.com)

## FIGURE S1

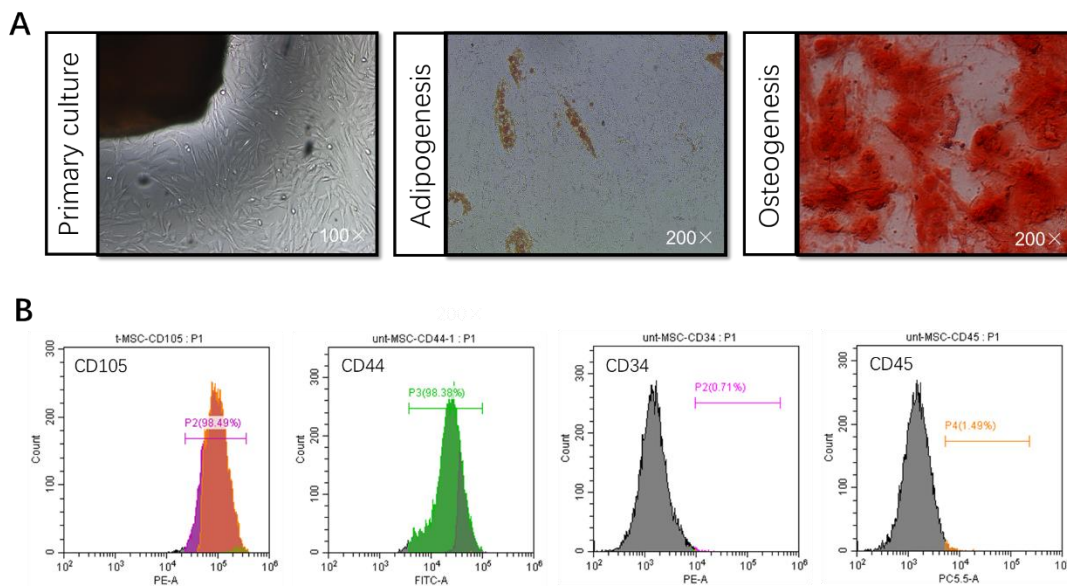

**FigureS1.** Isolation and identification of GC-MSCs. (A) GC-MSCs were isolated from the gastric cancer tissues through adherent culture. After the initial 1-2 weeks of primary culture, GC-MSCs adhered to the surface of the culture dish and displayed a small population of cells with spindle or fusiform shape. Differentiation capacity of GC-MSCs was evaluated after 16 days of induction in the conditioned media. GC-MSCs presented the ability of differentiating into adipocytes and osteocytes under different inducing conditions, displayed by positive staining of Oil Red O (for adipogenesis) and Alizarin Red S (for osteogenesis). (B) Flow cytometry is used to identify representative markers of GC-MSCs and it turned out to be positive for CD44, CD105 while negative for CD45 and CD34.

**FIGURE S2**

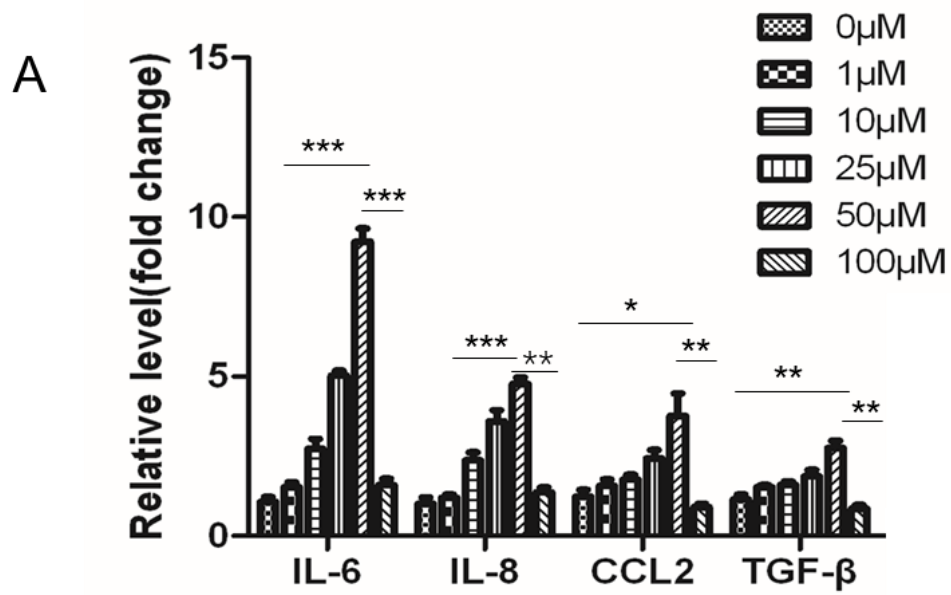

**Figure S2.** DIM regulate the expression level of cytokines of GC-MSCs. (A) Real-time RT-PCR for the expression of *CCL2*, *IL-6*, *IL-8*, and *TGF- $\beta$*  genes in GC-MSCs treated with 100  $\mu$ M DIM for 48 h (n = 3, \* $P$  < 0.05, \*\*  $P$  < 0.01, \*\*\*  $P$  < 0.001 compared with the control group).

**FIGURE S3**

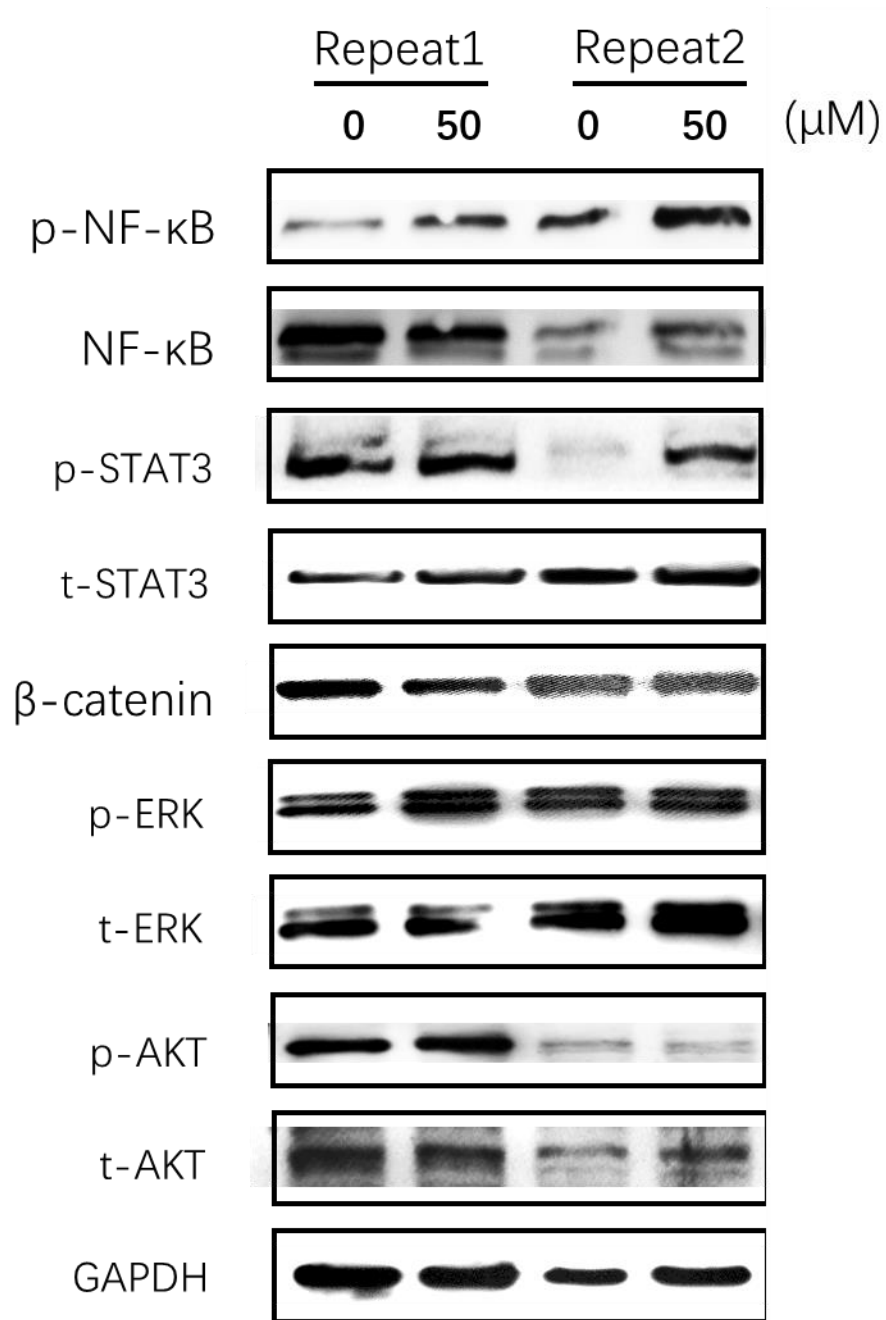

**Figure S3.** DIM stimulates signaling pathways in different degree. Western for the detection of expression of NF- $\kappa\text{B}$ , STAT3,  $\beta$ -catenin, ERK, AKT and GAPDH and in two different batches of GC-MSCs treated with 50  $\mu\text{M}$  DIM for 48 h.

**FIGURE S4**

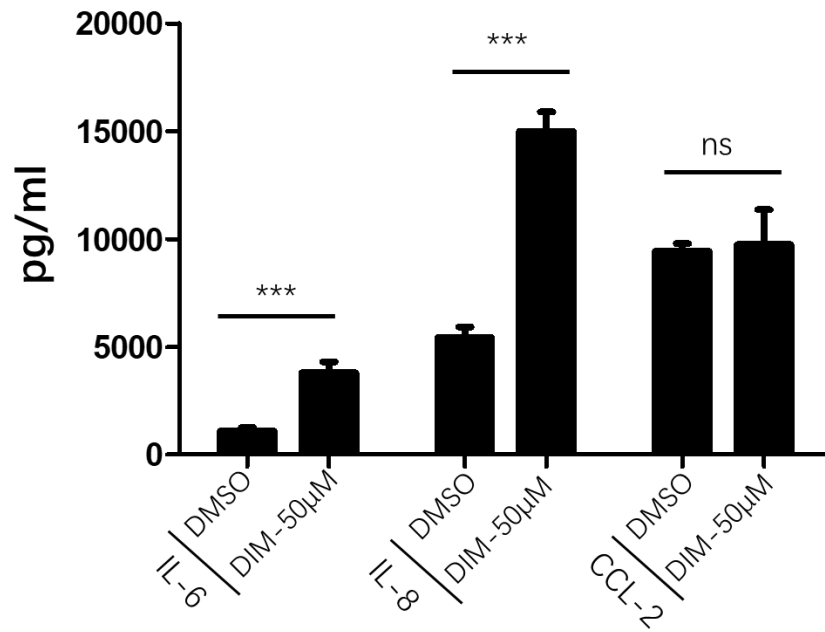

**Figure S4.** DIM promote the secretion of IL-6, IL-8 and CCL-2 of GC-MSCs. Cytokine profile analysis of GC-MSCs by Luminex immunoassay and the results of IL-6, IL-8 and CCL-2 has been listed. (n=3, \*\*\* P < 0.001 compared with the control group).
